# Supplementary material for: Early Development of Definitive Erythroblasts from Human Pluripotent Stem Cells Defined by Expression of Glycophorin A/CD235a, CD34, and CD36
Source: PubMed Central journal article supplement — Stem Cell Reports. 2016 Oct 6;7(5):869–83. doi: 10.1016/j.stemcr.2016.09.002 (PMC5106477; doi:10.1016/j.stemcr.2016.09.002), 2016-10-06
Supplement: mmc1.pdf [file mmc1.pdf]

**Stem Cell Reports, Volume 7**

**Supplemental Information**

**Early Development of Definitive Erythroblasts from Human Pluripotent  
Stem Cells Defined by Expression of Glycophorin A/CD235a, CD34, and  
CD36**

**Bin Mao, Shu Huang, Xulin Lu, Wencui Sun, Ya Zhou, Xu Pan, Jinfeng Yu, Mowen Lai, Bo  
Chen, Qiongxiu Zhou, Song Mao, Guohui Bian, Jiayi Zhou, Tatsutoshi Nakahata, and Feng  
Ma**

Figure S1

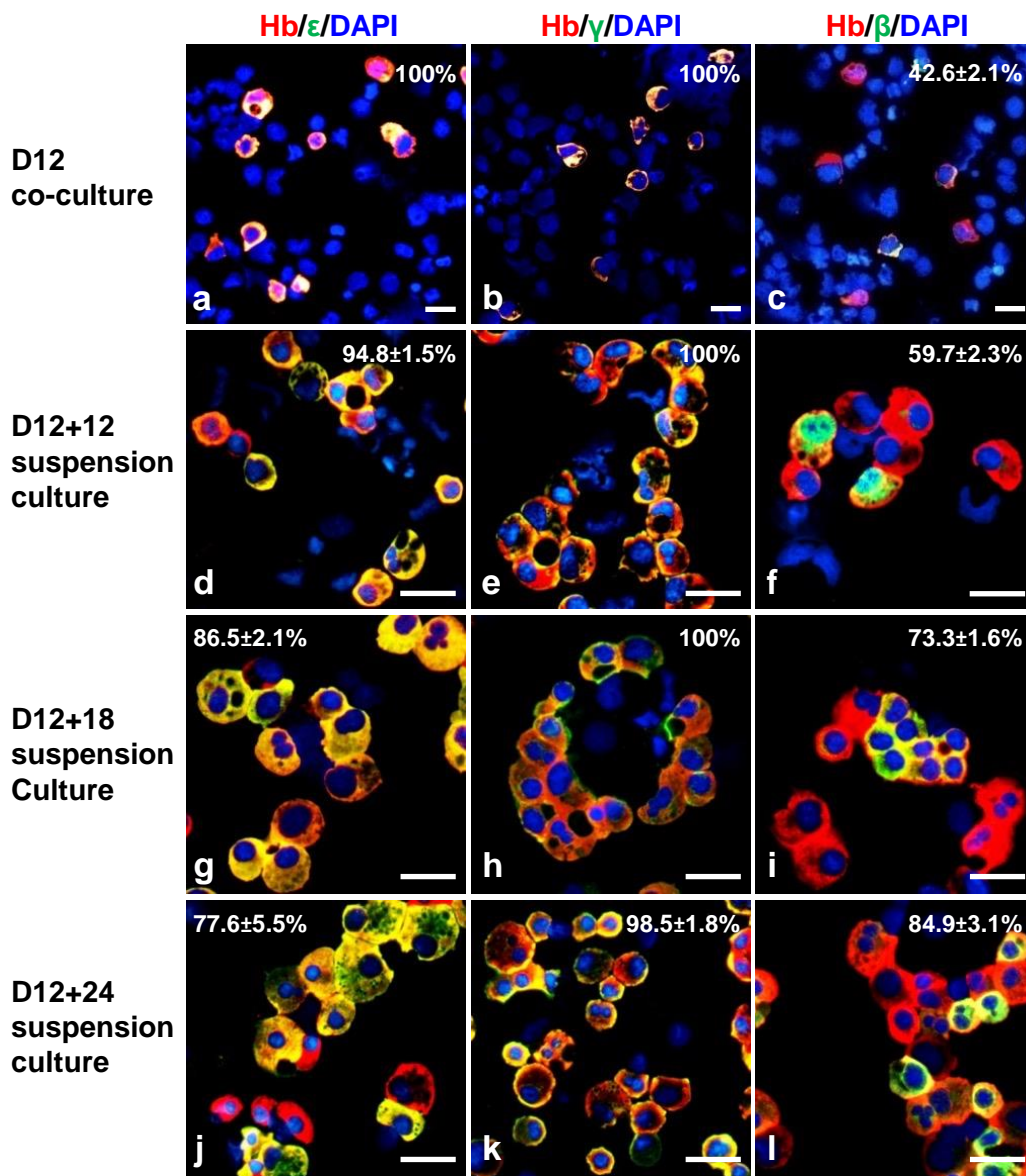

**Figure S1, Related to Figure 1. Changes in the expression of human hemoglobin in H1/mAGM-S3 co-culture-derived cells over time.**

Immunostaining of embryonic  $\epsilon$ -globin, fetal  $\gamma$ -globin and adult  $\beta$ -globin in erythroblasts derived from day 12 H1/AGM-S3 co-culture and subsequent suspension culture. (Red, Cy3; Green, FITC; Blue, DAPI; independent experiments, n=3; mean $\pm$ SD; bar=20um)

**Figure S2**

**A** hCB-CD34<sup>+</sup> HSPC-derived cells

**B** H1/AGM-S3-derived cells

*Co-culture cells*

*Suspension culture cells*

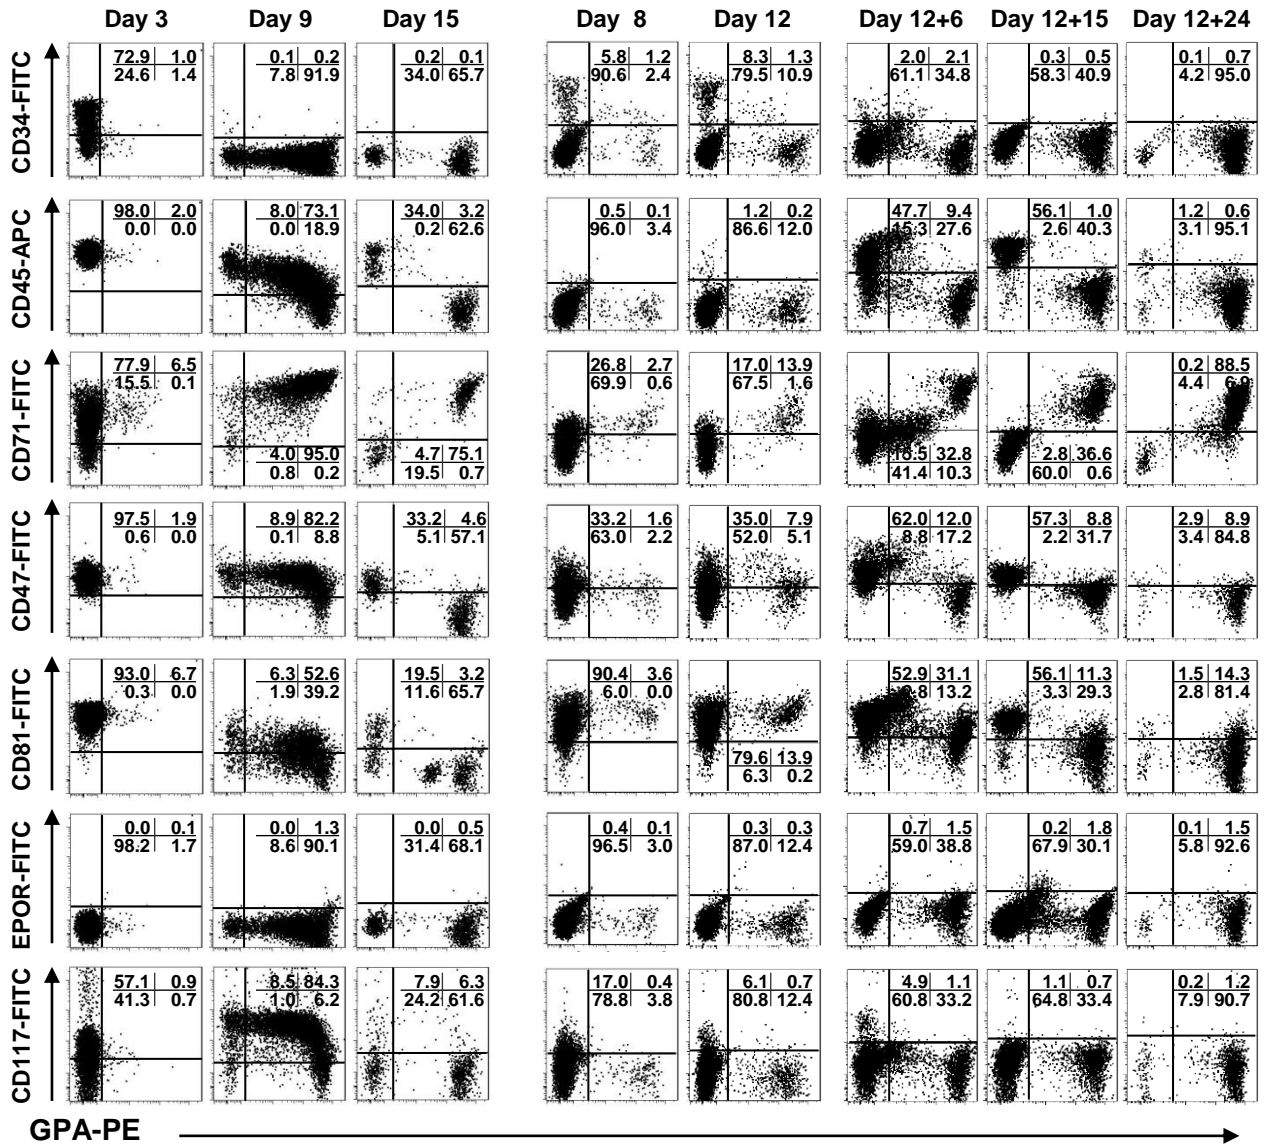

**C**

H1/AGM-S3-derived BFU-E colonies

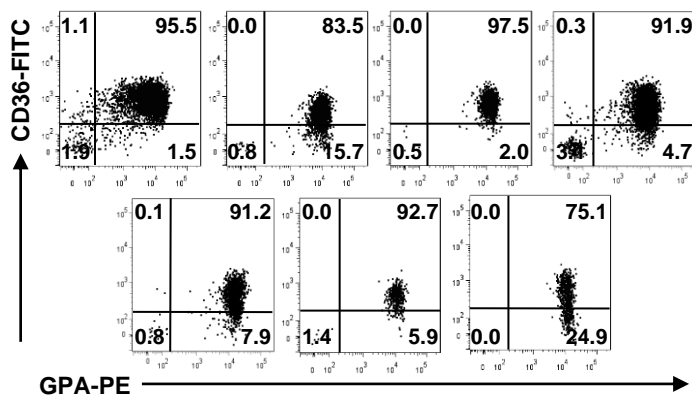

**Figure S2, Related to Figure 2. Changes of erythroid-lineage surface markers on cells derived from different origins.**

(A) Representative FC profiles showing changes of GPA, CD34, CD45, CD71, CD47, CD81, EPO-R and CD117(c-Kit) on hCB-CD34<sup>+</sup> HSPCs-derived cells over time.

(B) Representative FC profiles showing expression changes of GPA, CD34, CD45, CD71, CD47, CD81, EPO-R and CD117(c-kit) on H1/AGM-S3-derived co-culture cells and suspension culture cells from day 12 co-cultures over time.

(C) Co-expression of GPA and CD36 on cells in BFU-E colonies. BFU-E colonies were derived from day 12 H1/AGM-S3 co-culture and re-cultured in semi-solid medium for 14 days. Individual BFU-E colonies were randomly picked up for FC analysis (colony numbers, n=7).

**Figure S3**

**A** Sorted from day 10+5 H1/AGM-S3 and re-cultured

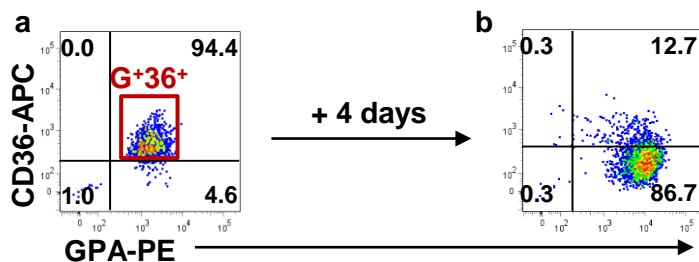

**B** Day 10+5 H1/AGM-S3

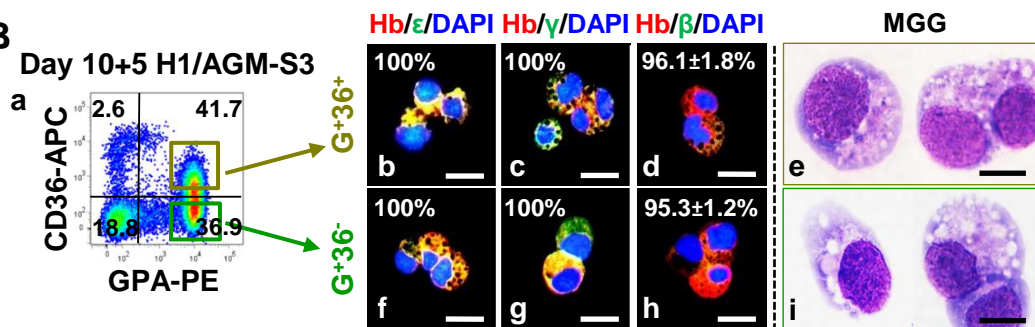

**C** Day 10+9 H1/AGM-S3

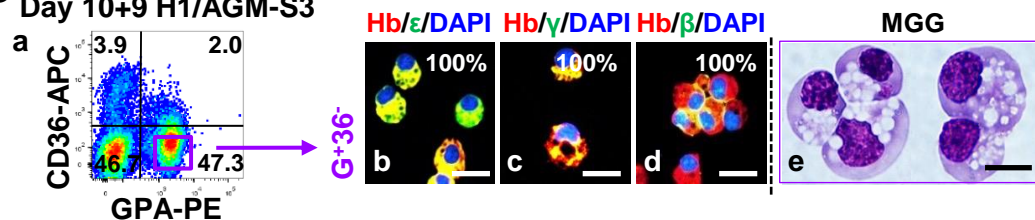

**D**

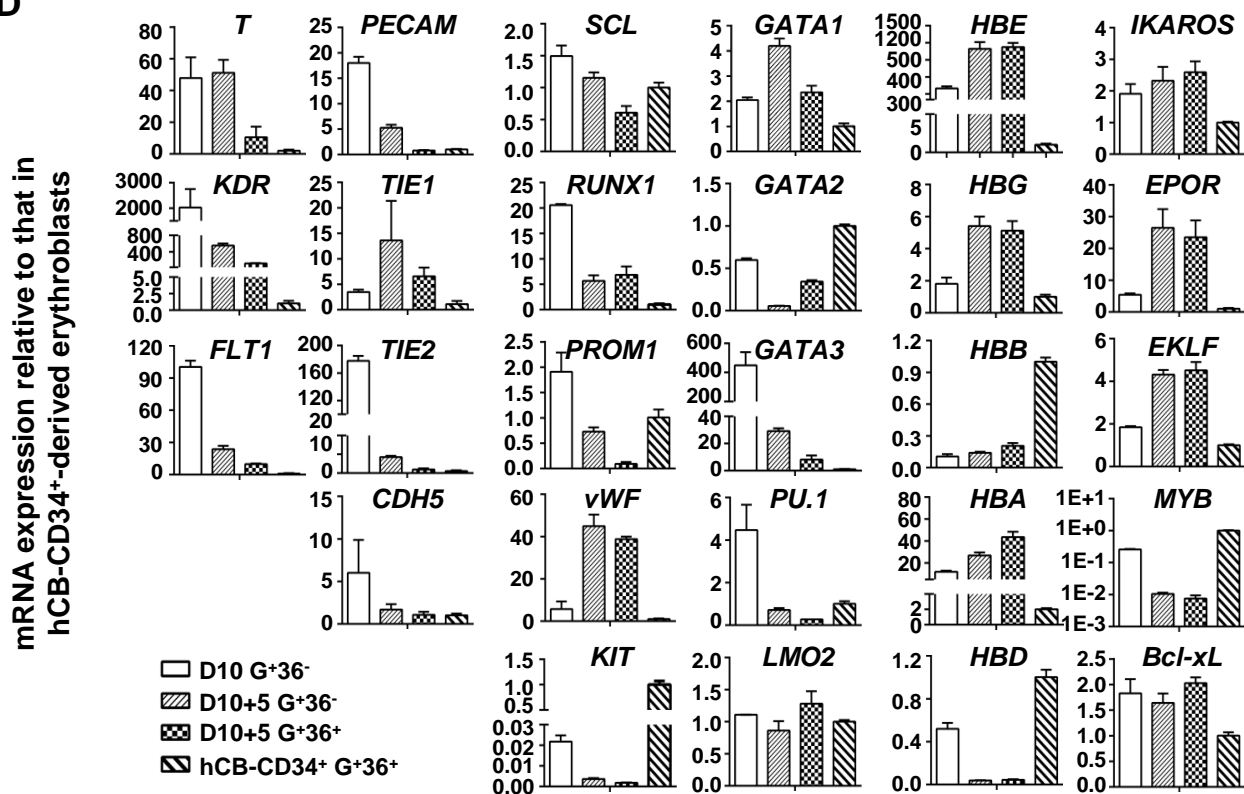

**Figure S3, Related to Figure 5. Erythroid cell fractions sorted from day 10+5 and day 10+9 cultures defined by expression of GPA and CD36.**

(A) (a) FC profile showing the purity of sorted GPA<sup>+</sup>CD36<sup>+</sup> (G<sup>+</sup>36<sup>+</sup>) cell fraction from day 10+5 H1/AGM-S3 co-culture. (b) FC profile showing the expression of CD36 on the progeny of sorted G<sup>+</sup>CD36<sup>+</sup> cells re-cultured in SFEM supplemented with 100 ng/mL SCF, 5 ng/mL IL-3, 4 IU/mL EPO and 10<sup>-6</sup> M dexamethasone for additional 4 days.

(B) (a) GPA<sup>+</sup>CD36<sup>+</sup> (G<sup>+</sup>36<sup>+</sup>) and GPA<sup>+</sup>CD36<sup>-</sup> (G<sup>+</sup>36<sup>-</sup>) cell fractions were sorted by FACS from day 10+5 H1/AGM-S3 co-culture. IF analysis showing co-expression of human Hb and  $\epsilon$ -,  $\gamma$ - and  $\beta$ -globins in G<sup>+</sup>36<sup>+</sup> (b–d) and G<sup>+</sup>36<sup>-</sup> (f–h) erythroid cell fractions (bar=20 $\mu$ m; independent experiments, n=3; mean  $\pm$ SD). (e, i) MGG staining showing the morphology of G<sup>+</sup>36<sup>+</sup> and G<sup>+</sup>36<sup>-</sup> cell fractions (bar=10 $\mu$ m).

(C) (a) The G<sup>+</sup>36<sup>-</sup> cell fraction was sorted by FACS from day 10+9 cultures. (b–d) IF analysis showing co-expression of human Hb and  $\epsilon$ -,  $\gamma$ - and  $\beta$ -globins in the G<sup>+</sup>36<sup>-</sup> erythroid cell fraction (bar=20 $\mu$ m; independent experiments, n=3; mean  $\pm$ SD). (e) MGG staining showing the morphology of the G<sup>+</sup>36<sup>-</sup> cell fraction from day 10+9 cultures (bar=10 $\mu$ m).

(D) Quantitative RT-PCR (qRT-PCR) analysis of hESC-derived induced erythroid cell fractions defined by expression of GPA and CD36. hCB-CD34<sup>+</sup> HSPC-derived erythroblasts (hCB-CD34<sup>+</sup> G<sup>+</sup>36<sup>+</sup>) were used as the control, which were representative of adult definitive erythroblasts. hCB-CD34<sup>+</sup> HSPCs differentiated into erythroid cells after 11 days and the purity of erythroid cells was almost 90%. Other erythroid cell fractions including GPA<sup>+</sup>CD36<sup>-</sup> cells on day 10 (D10 G<sup>+</sup>36<sup>-</sup>), G<sup>+</sup>36<sup>-</sup> and G<sup>+</sup>36<sup>+</sup> cells on day 10+5 (D10+5 G<sup>+</sup>36<sup>+</sup>; D10+5 G<sup>+</sup>36<sup>-</sup>) and G<sup>+</sup>36<sup>-</sup> cells on day 10+9 (D10+9 G<sup>+</sup>36<sup>-</sup>) were sorted by FACS. The purity of each sorted fraction was more than 90%. qRT-PCR analysis of transcripts in indicated cell fractions (independent experiments, n=3, mean  $\pm$ SD). The relative mRNA expression was normalized to *GAPDH* mRNA of each reaction. Each sample was compared to hCB-CD34<sup>+</sup> HSPC-derived erythroblasts.

**Figure S4**

**A**

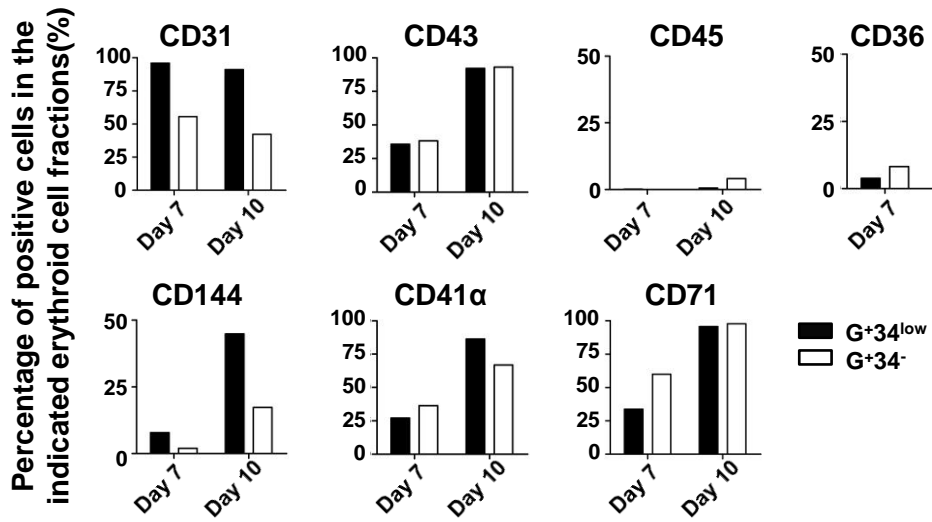

**B**

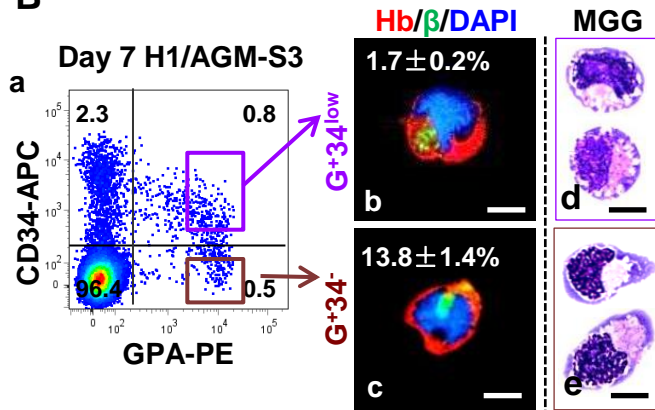

**C**

Daughter cells of G-34<sup>+</sup> cells from day 10 co-culture

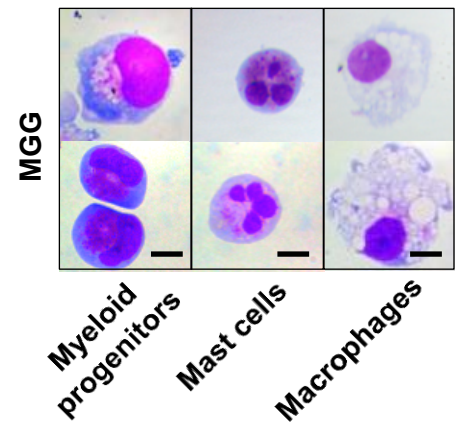



**Figure S4, Related to Figure 6. Characteristics of cells defined by GPA and CD34 from day 7 and day 10 co-culture.**

(A) FC analysis showing representative phenotypic expression on cell fractions  $GPA^+CD34^{low}$  ( $G^{+34^{low}}$ ) and  $GPA^+CD34^-$  ( $G^{+34^-}$ ) cells in day 7 and day10 co-culture, including endothelial, hematopoietic and erythroid lineage related surface makers.

(B)  $G^{+34^{low}}$  and  $G^{+34^-}$  cell fractions in day 7 H1/AGM-S3 co-culture. (a)  $G^{+34^{low}}$  and  $G^{+34^-}$  cell fractions were sorted by FACS from day 7 H1/AGM-S3 co-culture. (b, c) IF analysis showing co-expression of human Hb and  $\beta$ -globin in  $G^{+34^{low}}$  and  $G^{+34^-}$  cell fractions (bar= $10\mu m$ ; independent experiments,  $n=3$ ; mean $\pm$ SD). (d, e) MGG staining showing the morphology of  $G^{+34^{low}}$  and  $G^{+34^-}$  cell fractions (bar= $10\mu m$ ).

(C)  $G^{+34^-}$  cells were sorted from day 10 co-culture and recultured in myeloid supporting medium for 6 days. MGG staining showing the morphology of their daughter cells (bar= $10\mu m$ ).

**Table S1. Antibodies used for flow cytometric analysis**

| <b>Antigen</b> | <b>Fluor chrome Conjugated</b> | <b>Source</b> | <b>Clone</b> | <b>Isotype</b>          | <b>Cat. No.</b> |
|----------------|--------------------------------|---------------|--------------|-------------------------|-----------------|
| CD117          | APC                            | eBioscience   | YB5-B8       | Ms IgG <sub>1</sub> , κ | 17-1179-42      |
| CD144          | FITC                           | BD            | 55-7H1       | Ms IgG <sub>1</sub> , κ | 560411          |
| CD31           | FITC                           | BD            | WM59         | Ms IgG <sub>1</sub> , κ | 555445          |
| CD34           | FITC                           | BD            | 581          | Ms IgG <sub>1</sub> , κ | 555821          |
| CD36           | FITC                           | eBioscience   | eBioNL07     | Ms, IgM                 | 11-0369-42      |
| CD36           | FITC                           | BD            | CB38         | Ms IgG <sub>1</sub> , κ | 555454          |
| CD36           | FITC                           | BioLegend     | 5-271        | Ms IgG2a, κ             | 336204          |
| CD36           | FITC                           | BECKMAN       | FA6.152      | Ms IgG1                 | PNIM0766U       |
| CD36           | APC                            | BioLegend     | 5-271        | Ms IgG2a, κ             | 336208          |
| CD41a          | FITC                           | BD            | HIP8         | Ms IgG1, κ              | 555466          |
| CD43           | FITC                           | BD            | 1G10         | Ms IgG1, κ              | 555475          |
| CD45           | APC                            | BioLegend     | HI30         | Ms IgG1, κ              | 304012          |
| CD47           | FITC                           | BD            | B6H12        | Ms IgG1, κ              | 556045          |
| CD71           | FITC                           | BD            | M-A712       | Ms IgG2a, κ             | 555536          |
| CD81           | FITC                           | BD            | JS-81        | Ms IgG1, κ              | 551108          |
| EPO-R          | FITC                           | R&D           | 38409        | Ms IgG2b                | FAB307F         |
| GPA            | PE                             | Dako          | JC159        | Ms, MoAb                | R7078           |
| GPA            | PE                             | BD            | GA-R2        | Ms, IgG2b               | 555570          |
| 7-AAD          |                                | BD            |              |                         | 559925          |

**Table S2. Antibodies used for Hb immunostaining**

| <b>Antigen</b>               | <b>Source</b>           | <b>Specificity</b> | <b>Cat. No.</b> |
|------------------------------|-------------------------|--------------------|-----------------|
| Hemoglobin                   | Bethyl                  | Goat to Human      | A80-134A        |
| $\epsilon$ -globin           | FITCCORTEX Biochem      | Mouse to Human     | CR8008M         |
| $\gamma$ -globin             | Santa Cruz Biotech      | Mouse to Human     | sc-21756        |
| $\beta$ -globin              | Santa Cruz Biotech      | Mouse to Human     | sc-21757        |
| FITC-conjugated Secondary Ab | Jackson Immuno Research | Donkey to Goat     | 705-095-003     |
| FITC-conjugated Secondary Ab | Jackson Immuno Research | Donkey to Mouse    | 715-095-150     |
| Cy3-conjugated Secondary Ab  | Jackson Immuno Research | Donkey to Goat     | 705-165-003     |

**Table S3. Primers used for qRT-PCR**

| <b>Gene</b>   | <b>Direction</b> | <b>Sequences</b>                     |
|---------------|------------------|--------------------------------------|
| <i>T</i>      | Forward          | 5' CCT TCA GCA AAG TCA AGC TCA CC 3' |
|               | Reverse          | 5' TGA ACT GGG TCT CAG GGA AGC A 3'  |
| <i>LMO2</i>   | Forward          | 5' GCG CCT CTA CTA CAA ACT GGG C 3'  |
|               | Reverse          | 5' CTC ATA GGC ACG AAT CCG CTT 3'    |
| <i>KDR</i>    | Forward          | 5' GGA ACC TCA CTA TCC GCA GAG 3'    |
|               | Reverse          | 5' CCA AGT TCG TCT TTT CCT GGG C 3'  |
| <i>FLT1</i>   | Forward          | 5' CCTGCAAGATTCAGGCACCTATG 3'        |
|               | Reverse          | 5' GTT TCG CAG GAG GTA TGG TGC T 3'  |
| <i>Tie-1</i>  | Forward          | 5' GAC GCA CCT TCA CCT ACC A 3'      |
|               | Reverse          | 5' GAG GCA TAC TCT TTC AGC ATT T 3'  |
| <i>Tie-2</i>  | Forward          | 5' GGT CAA GCA ACC CAG CCT TTT C 3'  |
|               | Reverse          | 5' CAG GTC ATT CCA GCA GAG CCA A 3'  |
| <i>CDH5</i>   | Forward          | 5' GAC CTC TCT GTG AAG CAA CTG C 3'  |
|               | Reverse          | 5' CAC ATT GTC ACG GTA GTT GGT GG 3' |
| <i>vWF</i>    | Forward          | 5' CCT TGA ATC CCA GTG ACC CTG A 3'  |
|               | Reverse          | 5' GGT TCC GAG ATG TCC TCC ACA T 3'  |
| <i>c-Kit</i>  | Forward          | 5' CAC CGA AGG AGG CAC TTA CAC A 3'  |
|               | Reverse          | 5' CAC CGA AGG AGG CAC TTA CAC A 3'  |
| <i>PECAM1</i> | Forward          | 5' AAG TGG AGT CCA GCC GCA TAT C 3'  |
|               | Reverse          | 5' ATG GAG CAG GAC AGG TTC AGT C 3'  |
| <i>GATA1</i>  | Forward          | 5' CAC GAC ACT GTG GCG GAG AAA T 3'  |
|               | Reverse          | 5' TTC CAG ATG CCT TGC GGT TTC G 3'  |
| <i>GATA2</i>  | Forward          | 5' CAG CAA GGC TCG TTC CTG TTC A 3'  |
|               | Reverse          | 5' ATG AGT GGT CGG TTC TGC CCA T 3'  |
| <i>GATA3</i>  | Forward          | 5' ACC ACA ACC ACA CTC TGG AGG A 3'  |
|               | Reverse          | 5' TCG GTT TCT GGT CTG GAT GCC T 3'  |
| <i>PU.1</i>   | Forward          | 5' GAC ACG GAT CTA TAC CAA CGC C 3'  |
|               | Reverse          | 5' CCG TGA AGT TGT TCT CGG CGA A 3'  |
| <i>IKAROS</i> | Forward          | 5' CGG CTT TGT CGG GAG TTG 3'        |
|               | Reverse          | 5' GCC CTT CTG GGT GAA TGA G 3'      |
| <i>RUNX1</i>  | Forward          | 5' CCA CCT ACC ACA GAG CCA TCA A 3'  |
|               | Reverse          | 5' TTC ACT GAG CCG CTC GGA AAA G 3'  |
| <i>SCL</i>    | Forward          | 5' GAC ACA GTG CAA GCT GGA AGA C 3'  |
|               | Reverse          | 5' AGT CAG GCT CTT GAT CCT CAC C 3'  |
| <i>PROM1</i>  | Forward          | 5' TTG TGG CAA ATC ACC AGG TA 3'     |
|               | Reverse          | 5' TCA GAT CTG TGA ACG CCT TG 3'     |
| <i>EKLF</i>   | Forward          | 5' TTG CGG CAA GAG CTA CAC CAA G 3'  |
|               | Reverse          | 5' GTA GTG GCG GGT CAG CTC GTC 3'    |
| <i>EPOR</i>   | Forward          | 5' GCC TCT TCA CCA CC CAC AA 3'      |
|               | Reverse          | 5' TCC ACT GCC TGC ATC GTC 3'        |
| <i>MYB</i>    | Forward          | 5' GGG AAC AGA TGG GCA GAA ATC G 3'  |
|               | Reverse          | 5' GCTGGCTTTTGAAGACTCCTGC 3'         |
| <i>HBE</i>    | Forward          | 5' AAC CTC AAG CCC GCC TTT GCT A 3'  |
|               | Reverse          | 5' GGT GAA CTC CTT GCC AAA GTG AG 3' |
| <i>HBG</i>    | Forward          | 5' GGA AGA TGC TGG AGG AGA AAC C 3'  |
|               | Reverse          | 5' GTC AGC ACC TTC TTG CCA TGT G 3'  |
| <i>HBB</i>    | Forward          | 5' CAC CTT TGC CAC ACT GAG TGA G 3'  |
|               | Reverse          | 5' CCA CTT TCT GAT AGG CAG CCT G 3'  |
| <i>HBA</i>    | Forward          | 5' GAC CTG CAC GCG CAC AAG CTT 3'    |
|               | Reverse          | 5' GCT CAC AGA AGC CAG GAA CTT G 3'  |
| <i>HBD</i>    | Forward          | 5' GCT CAT GGC AAG AAG GTG CTA G 3'  |
|               | Reverse          | 5' ACA CCA GCA CAT TGC CCA AGA G 3'  |
| <i>BCL-xL</i> | Forward          | 5' TGA CCA CCT AGA GCC TTG GA 3'     |
|               | Reverse          | 5' CTG AAG AGT GAG CCC AGC AG 3'     |
